# Supplementary material for: Inter-Basin Comparison of Sedimentary dynamics and Diagenetic Evolution of the Middle Buntsandstein: Insights from Outcrop Samples (Vosges and Trier) and Subsurface Data (Southern Netherlands)
Source: Research Square preprint supplement (doi:10.21203/rs.3.rs-6264155/v1), 2025-03-28
Supplement: Supplementary file 1 [file fc891e2d879045a403d46a94.xlsx]

## Sheet: Supplementary data
Sample information						Detrital mineral contents						Authigenic mineral contents													Texture	Normalized detrital contents (QFR)
ID	Location/Well	Depth (m)	Formation	Depositional Environments	Bleached/Unbleached	Qz	Fsp	RF	DC	Mi	HM	Qo	Fo	Cal	Dol	Fe-Dol	Si	An	Kao	Ill	Ch	Py	FeOx	MnOx	AGS	TQ	TF	TRF
						%	%	%	%	%	%	%	%	%	%	%	%	%	%	%	%	%	%	%	µm	%	%	%
MB-01	Burzweiler	Outcrop	Grès a Voltzia	Fluvial	Bleached-SBS	57	9.8	6.7	0	0.3	0	1	1.5	0	0	0	0	0	0	0.3	0	0	3.7	0	220	77.551	13.3333	9.11565
MB-02	Burzweiler	Outcrop	Grès a Voltzia	Fluvial	Bleached-SBS	53	8.7	6.5	0	0.3	0	2	1.6	0	0	0	0	0	0	0.3	0	0	5.1	0	220	77.7126	12.7566	9.53079
MB-03	Burzweiler	Outcrop	Grès a Voltzia	Fluvial	Bleached-SBS	54.5	9.1	5.6	0	0.3	0	1.6	1.1	0	0	0	0	0	0	0.3	0	0	4.2	0	212.75	78.7572	13.1503	8.09249
MB-04	Burzweiler	Outcrop	Grès a Voltzia	Fluvial	Bleached-SBS	54	11.5	7.7	0	0.3	0	1.9	2	0	0	0	0	0	0	0.3	0	0	3.4	0	188.89	73.7705	15.7104	10.5191
MB-05	HautBarr	Outcrop	Couches Intermediaires	Fluvial	Bleached-LBBS	65.8	9.1	2.9	0	0	0	0.1	0	0	0	0	0	0	0	3.4	0	0	10.5	2.5	80.8095	84.5758	11.6967	3.72751
MB-06	HautBarr	Outcrop	Couches Intermediaires	Fluvial	Bleached-LBBS	63.5	10.33	2.55	0	0	0	0.7	0	0	0	0	0	0	0	3.7	0	0	10.22	2.3	89.3158	83.1369	13.5245	3.33857
MB-07	HautBarr	Outcrop	Couches Intermediaires	Fluvial	Bleached-LBBS	65.41	9.88	2.3	0	0	0	0.1	0	0	0	0	0	0	0	2.8	0	0	11.3	2	84.85	84.3021	12.7336	2.9643
MB-08	HautBarr	Outcrop	Couches Intermediaires	Fluvial	Unbleached	69.1	7.31	1.8	0	0	0	0.7	0	0	0	0	0	0	0.1	3	0	0	12.38	2.06	180	88.3519	9.34663	2.3015
MB-09	HautBarr	Outcrop	Couches Intermediaires	Fluvial	Unbleached	55.61	13.69	0.16	0	0	0	2.5	1.4	0	0	0	0	0	0	1	0	0	7.4	7.75	154.091	80.0605	19.7092	0.230348
MB-10	Kordel	Outcrop	Grès Vosgien	Fluvial	Unbleached	52	9.69	2.1	0	0	0	0.46	0.2	0	0	0	0	0	0.3	0.4	0	0	16.27	1.5	182	81.5175	15.1905	3.29205
MB-11	Soultzerkopf	Outcrop	Grès Vosgien	Fluvial	Bleached-SBS	60.8	9.2	2.3	0	0	0	0.3	0	0	0	0	0	0	0.33	3	0	0	16	0	111.667	84.0941	12.7248	3.18119
MB-12	Soultzerkopf	Outcrop	Grès Vosgien	Fluvial	Bleached-SBS	60.22	10.8	2	0	0	0	0	0	0	0	0	0	0	0	2.5	0	0	16.58	0	105	82.4706	14.7905	2.73898
MB-13	Soultzerkopf	Outcrop	Grès Vosgien	Fluvial	Bleached-SBS	62.5	11.4	3.7	0	0	0	0.5	0.4	0	0	0	0	0	0.67	2.61	0	0	11	0	104.688	80.5412	14.6907	4.76804
MB-14	Barrois	Quarry	Grès Vosgien	Fluvial	Unbleached	54.8	11.7	3.8	0	0	0	0.5	0.2	0	0	0	0	0	0	1.3	0	0	13.9	0.64	120.786	77.9516	16.643	5.40541
MB-15	Loegel	Quarry	Grès Vosgien	Fluvial	Bleached-SBS	59.96	12.62	1.32	0	0	0	0.1	0	0	0	0	0	0	0	3.1	0	0	6.3	1.6	129.308	81.1367	17.0771	1.7862
MB-16	Loegel	Quarry	Grès Vosgien	Fluvial	Bleached-SBS	62.85	12.1	3.61	0	0	0	1.2	0.7	0	0	0	0	0	0	0.63	0	0	5.8	0.5	210	80.0025	15.4022	4.59521
MB-17	Loegel	Quarry	Grès Vosgien	Fluvial	Bleached-LBBS	67.85	12.6	2.9	0	0	0	0.98	0.2	0	0	0	0	0	0	0.4	0	0	5.2	0.1	120.357	81.4037	15.117	3.4793
MB-18	Loegel	Quarry	Grès Vosgien	Fluvial	Bleached-LBBS	67.85	12.6	2.9	0	0	0	0.98	0.2	0	0	0	0	0	0	0.4	0	0	5.2	0.1	80.8095	81.4037	15.117	3.4793
MB-19	Loegel	Quarry	Grès Vosgien	Fluvial	Unbleached	54.1	12.2	2.6	0	0.5	0	1	0.8	0	0	0	0	0	0	2.1	0	0	10.4	2	241	78.5196	17.7068	3.77358
MB-20	Loegel	Quarry	Grès Vosgien	Fluvial	Unbleached	61.13	10.15	0.1	0	1	0	0.9	0.6	0	0	0	0	0	0	1	0	0	4.1	7.81	220	85.6402	14.2197	0.140095
MB-21	Loegel	Quarry	Grès Vosgien	Fluvial	Bleached-SBS	59.68	11.23	7.5	0	0.5	0	0.8	0.3	0	0	0	0	0	0	0	0	0	4.66	0	220	76.1127	14.3222	9.56511
MB-22	Loegel	Quarry	Grès Vosgien	Fluvial	Bleached-PBS	66	7.73	2.57	0	0	0	0.1	0	0	0	0	0	0	0	0.5	0	0	11.3	6.7	213	86.5007	10.1311	3.36828
MB-23	Loegel	Quarry	Grès Vosgien	Fluvial	Bleached-PBS	65.22	9.13	1.8	0	0	0	0	0	0	0	0	0	0	0	0.5	0	0	10.5	5.7	225	85.6467	11.9895	2.36376
MB-24	Loegel	Quarry	Grès Vosgien	Fluvial	Bleached-PBS	64.7	7.8	2	0	0	0	0.1	0	0	0	0	0	0	0	0	0	0	12.3	7.2	200	86.8456	10.4698	2.68456
MB-25	Loegel	Quarry	Grès Vosgien	Fluvial	Bleached-SBS	66.2	7.49	1.8	0	0	0	1.7	1	0	0	0	0	0	0	0.5	0	0	5.61	0	235	87.6937	9.92184	2.38442
MB-26	Loegel	Quarry	Grès Vosgien	Fluvial	Unbleached	44.31	9.82	2.31	0	0	0	0.5	0	0	0	0	0	0	0	0.5	0	0	16.57	5.2	213	78.5082	17.399	4.09284
MB-27	Loegel	Quarry	Grès Vosgien	Fluvial	Unbleached	51.2	5.6	0.5	0	0	0	0.3	0	0	0	0	0	0	0	2.5	0	0	8	12	190	89.3543	9.77312	0.8726
MB-28	Loegel	Quarry	Grès Vosgien	Fluvial	Unbleached	51.64	12.98	2.1	0	0	0	0.4	0	0	0	0	0	0	0	2.3	0	0	20.09	4.13	242	77.3981	19.4544	3.14748
MB-29	Loegel	Quarry	Grès Vosgien	Fluvial	Unbleached	51.38	11.3	1.67	0	0	0	2.7	1.3	0	0	0	0	0	0	0.3	0	0	17.84	0.9	283.667	79.8446	17.5602	2.59518
MB-30	Loegel	Quarry	Grès Vosgien	Fluvial	Unbleached	61.65	11.95	0.9	0	0	0	1.64	1.22	0	0	0	0	0	0	1.03	0	0	7.96	3.38	239.57	82.7517	16.0403	1.20805
MB-31	Loegel	Quarry	Grès Vosgien	Fluvial	Unbleached	64.78	7.97	5.98	0	0	0	1.1	0.8	0	0	0	0	0	0	1.02	0	0	8.29	2	194	82.2812	10.1232	7.59558
MB-32	Loegel	Quarry	Grès Vosgien	Fluvial	Unbleached	51	12.7	2.43	0	0	0	1.8	1.09	0	0	0	0	0	0	0.9	0	0	15.2	0.6	283.667	77.1208	19.2046	3.67458
MB-33	Loegel	Quarry	Grès Vosgien	Fluvial	Unbleached	54.78	7.97	5.98	0	0	0	1.4	0.5	0	0	0	0	0	0	1.02	0	0	9	1.29	210	79.7032	11.5961	8.70071
MB-34	Loegel	Quarry	Grès Vosgien	Fluvial	Unbleached	56.8	13.6	2.5	0	0	0	1.1	0.8	0	0	0	0	0	0	0.9	0	0	8.3	2.6	243.71	77.915	18.6557	3.42936
MB-35	Loegel	Quarry	Grès Vosgien	Fluvial	Bleached-LBBS	56.22	11.88	10.93	0	0.83	0	0.75	0	0	0	0	0	0	0.1	0.18	0	0	10.22	2.41	130.31	71.1375	15.0323	13.8302
MB-36	Loegel	Quarry	Grès Vosgien	Fluvial	Bleached-SBS	57.6	10.87	7.3	0	0	0	0.5	0	0	0	0	0	0	0	0.2	0	0	8.2	0.5	187.778	76.0195	14.346	9.63442
MB-37	Loegel	Quarry	Grès Vosgien	Fluvial	Bleached-LBBS	66.55	14.97	6.48	0	0	0	0.16	0	0	0	0	0	0	0	0.3	0	0	7.48	0.49	145	75.625	17.0114	7.36364
MB-38	Loegel	Quarry	Grès Vosgien	Fluvial	Bleached-SBS	55.7	12	10.1	0	0	0	0	0	0	0	0	0	0	0	0.5	0	0	8.5	1	187.778	71.5938	15.4242	12.982
MB-39	Loegel	Quarry	Grès Vosgien	Fluvial	Unbleached	51.19	11.27	0.5	0	0	0	1	0.49	0	0	0	0	0	0	0.24	0	0	18.86	1.19	281.17	81.3056	17.9003	0.794155
MB-40	Loegel	Quarry	Grès Vosgien	Fluvial	Bleached-PBS	59.9	13.64	11.98	0	1	0	0	0	0	0	0	0	0	0.16	0.6	0	0	4.99	0.16	190	70.0421	15.9495	14.0084
MB-41	Loegel	Quarry	Grès Vosgien	Fluvial	Bleached-PBS	60.8	12.74	12.66	0	0.5	0	0	0	0	0	0	0	0	0.5	1.2	0	0	3.5	0	187.5	70.5336	14.7796	14.6868
MB-42	Loegel	Quarry	Grès Vosgien	Fluvial	Bleached-PBS	59.5	14.83	11.91	0	0.66	0	0	0	0	0	0	0	0	0.1	0.7	0	0	4.2	0.8	182	68.9935	17.1962	13.8103
MB-43	Loegel	Quarry	Grès Vosgien	Fluvial	Bleached-PBS	61.1	13.19	10.6	0	0.7	0	0	0	0	0	0	0	0	0.3	0.1	0	0	5.1	0.1	180	71.9755	15.5378	12.4867
MB-44	Loegel	Quarry	Grès Vosgien	Fluvial	Unbleached	57.35	11.19	5.2	0	0	0	0.51	0.3	0	0	0	0	0	0.3	0.49	0	0	13.07	0.16	187	77.7733	15.1749	7.0518
MB-45	Loegel	Quarry	Grès Vosgien	Fluvial	Unbleached	43.39	11.63	3.84	0	0	0	0	0	0	0	0	0	0	0	1.5	0	0	18.21	11.9	169.5	73.7173	19.7587	6.52396
MB-46	Loegel	Quarry	Grès Vosgien	Fluvial	Unbleached	42.48	12.29	4.58	0	0	0	0.5	0	0	0	0	0	0	0	1	0	0	17.88	12.35	154.636	71.5754	20.7077	7.71693
MB-47	Loegel	Quarry	Grès Vosgien	Fluvial	Unbleached	41.16	12.83	4.83	0	0	0	0.33	0	0	0	0	0	0	0	1.4	0	0	18.32	12.6	170	69.9762	21.8123	8.21149
MB-48	Loegel	Quarry	Grès Vosgien	Fluvial	Bleached-SBS	56.3	9.6	2.1	0	0	0	0.8	0.2	0	0	0	0	0	0	1	0	0	16.5	2.8	93.3889	82.7941	14.1176	3.08824
MB-49	Loegel	Quarry	Grès Vosgien	Fluvial	Bleached-LBBS	54.24	11.4	3.21	0	0	0	0.5	0	0	0	0	0	0	0	0.7	0	0	17.5	3.28	99.4118	78.78	16.5577	4.66231
MB-50	Loegel	Quarry	Grès Vosgien	Fluvial	Bleached-LBBS	65.89	13.96	10.81	0	0.7	0	0	0	0	0	0	0	0	0	0.83	0	0	1.99	0	105.06	72.6781	15.3982	11.9237
MB-51	Loegel	Quarry	Grès Vosgien	Fluvial	Bleached-SBS	64.15	10	3.16	0	0	0	5	1.2	0	0	0	0	0	0	0	0	0	0.5	0	282.57	82.9776	12.9349	4.08744
MB-52	Loegel	Quarry	Grès Vosgien	Fluvial	Bleached-SBS	62.48	5.98	2.76	0	0	0	1.3	1	0	0	0	0	0	0	1.9	0	0	7.3	0	239.57	87.7282	8.39652	3.87532
MB-53	Loegel	Quarry	Grès Vosgien	Fluvial	Bleached-PBS	69.5	9.93	5.8	0	0	0	0	0	0	0	0	0	0	0	0	0	0	6.22	0	184.6	81.5441	11.6508	6.80512
MB-54	Loegel	Quarry	Grès Vosgien	Fluvial	Bleached-PBS	68.3	10.25	4.98	0	0	0	0.1	0	0	0	0	0	0	0	0.5	0	0	7.1	0	190.2	81.767	12.271	5.96193
MB-55	Loegel	Quarry	Grès Vosgien	Fluvial	Bleached-PBS	67.22	10	4.88	0	0	0	0.5	0	0	0	0	0	0	0	0.5	0	0	7.2	0	192.33	81.8758	12.1803	5.94397
MB-56	Loegel	Quarry	Grès Vosgien	Fluvial	Bleached-PBS	67.52	10.56	4.21	0	0	0	0.1	0	0	0	0	0	0	0	1	0	0	7.5	0	187.2	82.0513	12.8327	5.11605
MB-57	Kronthal	Outcrop	Grès Vosgien	Fluvial	Unbleached	68	7.2	1	0	0	0	1.2	0.8	0	0	0	0	0	0	1.2	0	0	11.6	0.6	240	89.2388	9.44882	1.31234
MB-58	Kronthal	Outcrop	Grès Vosgien	Fluvial	Unbleached	54.84	9.6	5.7	0	1	0	1	0.2	0	0	0	0	0	0	3.4	0	0	12.5	2.8	139.3	78.1865	13.6869	8.1266
MB-59	Kronthal	Outcrop	Grès Vosgien	Fluvial	Unbleached	58.7	10.2	1.8	0	0	0	0	0	0	0	0	0	0	0	0.5	0	0	26.8	0	220	83.0269	14.4272	2.54597
MB-60	Kronthal	Outcrop	Grès Vosgien	Fluvial	Bleached-LBBS	54.34	10.8	5.23	0	0.7	0	1	0	0	0	0	0	0	0	3.2	0	0	13.4	3.2	135.5	77.2204	15.3474	7.43214
MBS-01	KDZ-02-S1	3258.4	Hardegsen	Aeolian	Bleached-SBS	68.3	1	3.3	0.7	0.3	0.1	1.3	0	0	0	0	0.7	0	1.3	0	2	0	0.1	0	237.5	94.0771	1.37741	4.54545
MBS-02	KDZ-02-S1	3259.9	Hardegsen	Aeolian	Bleached-SBS	33	4	4.3	2	0	0.3	4.3	0.1	0	3	0	0	0	3.7	0	1.3	0	0	0	399	79.9031	9.68523	10.4116
MBS-03	KDZ-02-S1	3260.8	Hardegsen	Aeolian	Bleached-SBS	76	4.6	4.3	0	0	0.1	4	0.1	0	0	0	0	0	0	0	1.7	0	0.1	0	338.5	89.5171	5.41814	5.06478
MBS-04	KDZ-02-S1	3262.3	Hardegsen	Aeolian	Bleached-SBS	75.3	6	1.3	5.7	0	0.3	1.3	0.1	0	4.3	0	0	0	0	0	3.3	0	0.1	0	294	91.1622	7.26392	1.57385
MBS-05	KDZ-02-S1	3263.2	Hardegsen	Aeolian	Bleached-SBS	79.3	5.3	1	1.7	0	0.1	0.3	0.1	0	7	0	0	0	0	0	1.3	0	0	0	312.5	92.6402	6.19159	1.16822
MBS-06	KDZ-02-S1	3264.7	Hardegsen	Aeolian	Bleached-SBS	72.3	10	0.3	0.3	0	0	1.3	0	0	5.7	0	0	0	0	0	2.7	0	0.1	0	312.5	87.5303	12.1065	0.363196
MBS-07	KDZ-02-S1	3265.9	Hardegsen	Aeolian	Bleached-SBS	71.4	10.3	3.3	1	0	0.1	3.3	0.1	0	5.3	0	0	0	0	0	2.7	0	0.1	0	312.5	84	12.1176	3.88235
MBS-08	KDZ-02-S1	3266.8	Hardegsen	Aeolian	Bleached-SBS	69	7.3	2	0.7	0.1	0.7	4.7	0.1	0	6	0	0	0	0	0	1.3	0	0	0	300	88.1226	9.32312	2.55428
MBS-09	KDZ-02-S1	3268	Hardegsen	Aeolian	Bleached-SBS	70	6	1.7	0	0	0.3	0.1	0.1	0	3.7	0	0	0	0	0	6.3	0	0	0	425	90.0901	7.72201	2.1879
MBS-10	KDZ-02-S1	3269.5	Hardegsen	Aeolian	Bleached-SBS	69.3	1.3	1	5.3	0.3	0.1	1.3	0	0	3.3	0	0	0	0.3	0	2.7	0	0	0	312.5	96.7877	1.81564	1.39665
MBS-11	KDZ-02-S1	3269.8	Hardegsen	Aeolian	Bleached-SBS	67.3	10	2	0	0	0.1	5	0	0	6.4	0	0.7	0	0.1	0	2	0	0.1	0	312.5	84.8676	12.6103	2.52207
MBS-12	KDZ-02-S1	3270.7	Hardegsen	Aeolian	Bleached-SBS	66.6	9.7	4	0.3	0	0.1	0.7	0.3	0	13.7	0	0	0	0.1	0	2.3	0	0.1	0	417.5	82.939	12.0797	4.98132
MBS-13	KDZ-02-S1	3271.9	Hardegsen	Aeolian	Bleached-SBS	66.6	12	2	1	0	0.1	0.1	0.1	0	7.6	0	0	0	6	0	1.7	0	0	0	530	82.6303	14.8883	2.48139
MBS-14	KDZ-02-S1	3272.8	Hardegsen	Aeolian	Bleached-SBS	66.3	13.7	3	0	0	0	1	0	0	5.3	0	0	0	0	0	2.7	0	0	0	425	79.8795	16.506	3.61446
MBS-15	KDZ-02-S1	3080.3	Hardegsen	Aeolian	Bleached-SBS	70.6	11	2	2.3	0	0.1	0.7	0.1	0	4.7	0	0	0	1	0	2.3	0	0	0	237.5	84.4498	13.1579	2.39234
MBS-16	KDZ-02-S1	3080.6	Hardegsen	Aeolian	Bleached-SBS	62.4	20.3	2.7	1.7	0	0.1	2.7	0.1	0	10.6	0	0	0	1	0	2	0	0.3	0	338.5	73.0679	23.7705	3.16159
MBS-17	GAAG-2A	3082.1	Hardegsen	Aeolian	N/A	66.3	7.7	0.1	0.1	0.1	0.3	4.7	0	0	2	0.3	0	0	0	0	0.1	0	0	0	425	89.4737	10.3914	0.134953
MBS-18	GAAG-2A	3084.5	Hardegsen	Aeolian	N/A	62.7	15	0.1	0.1	0.1	0	0.1	0.1	0	2.3	3.3	0	0	1.3	0	0.1	0	0	0	375	80.5913	19.2802	0.128535
MBS-19	GAAG-2A	3086.3	Hardegsen	Aeolian	N/A	65.3	17.3	0.1	0.1	0.1	0.3	0.1	0	0	2.7	2.3	0	0	0.1	0	0.1	0	0	0	375	78.9601	20.919	0.120919
MBS-20	GAAG-2A	3088.7	Hardegsen	Aeolian	N/A	57	3.7	0.3	2	0	0.1	1	0	0	2	1.3	0	0	0	0	0.1	0	0	0.1	375	93.4426	6.06557	0.491803
MBS-21	GAAG-2A	3090.2	Hardegsen	Aeolian	N/A	69.4	1.3	0.7	3	0	0.1	1	0	0	1.7	3.3	0	0	0	0	0.1	0.3	0	0	375	97.1989	1.82073	0.980392
MBS-22	GAAG-5	4085.4	Hardegsen	Aeolian	Bleached-SBS	56.4	5.3	0.3	0.7	0.3	0.1	15	0	0	0.3	0.3	0	0	0.3	0	0.1	0	0	0.1	425	90.9677	8.54839	0.483871
MBS-23	GAAG-5	4087.8	Hardegsen	Aeolian	Bleached-SBS	51	7.3	0.3	7	0.1	0.1	6.7	0	0	5	2.3	0	0	0.3	0	0.1	0	0	0	375	87.0307	12.4573	0.511945
MBS-24	GAAG-5	4090.25	Hardegsen	Aeolian	Bleached-SBS	77.3	8.3	0.1	0	0	0.1	0.1	0	0	2.7	0.7	0	0	7.3	0	0	0	0	0	425	90.1984	9.68495	0.116686
MBS-25	GAAG-5	4093.2	Hardegsen	Aeolian	Bleached-SBS	71.4	8.7	0.1	0	0.1	0.1	0.7	0	0	5	2	0	0	0.3	0	0.1	0	0	0	375	89.0274	10.8479	0.124688
MBS-26	GAAG-5	4095.4	Hardegsen	Aeolian	Bleached-SBS	80.7	3.3	0.1	6.3	0.1	0.1	1	0	0	0.1	0.1	0	0	1.3	0	0.3	0	0	0	312.5	95.9572	3.9239	0.118906
MBS-27	GAAG-5	4100.55	Hardegsen	Aeolian	Bleached-SBS	71.3	8	0.1	0.3	0.1	0.1	1	0	0	3	3.3	0	0	7	0	0.1	0	0	0	312.5	89.7985	10.0756	0.125945
MBS-28	GAAG-5	4103.6	Hardegsen	Aeolian	Bleached-SBS	70.3	2.7	0.1	5.7	0.1	0.1	0.7	0	0	2.3	1.7	0	0	1.3	0	0.1	0	0	0	237.5	96.1696	3.69357	0.136799
MBS-29	GAAG-5	2812.55	Hardegsen	Aeolian	Bleached-SBS	68.7	2	0.1	6.3	0	0.7	0.7	0	0	3.7	4.3	0	0	0.3	0	0.3	0	0	0	187.5	97.0339	2.82486	0.141243
MBS-30	GAAG-5	2813.6	Hardegsen	Aeolian	Bleached-SBS	72	4.3	0.1	1	0	0.1	0.7	0	0	0	2	0	0	0.7	0	0.1	0	0	0	263.5	94.2408	5.62827	0.13089
MBS-31	RDK-01	2817.13	Hardegsen	Aeolian	Bleached-SBS	67	6	1.3	5	0.7	0.1	5	0	0	0	0	0	0	0.1	0.1	5	0.1	0	0.1	263.5	90.175	8.07537	1.74966
MBS-32	RDK-01	2819.95	Hardegsen	Aeolian	Bleached-SBS	63	2.3	1.3	4.7	1	0.1	4.3	0.1	0	0	0	0	0	7.7	0.1	7.3	0.1	0	0.1	300	94.5946	3.45345	1.95195
MBS-33	RDK-01	2822.23	Hardegsen	Aeolian	Bleached-SBS	70.7	2.1	0.7	3.3	0.1	0.1	5	0.1	0	1.7	8.6	0	0	0.3	0.1	2	0.1	0	0.1	300	96.1905	2.85714	0.952381
MBS-34	RDK-01	2825.08	Hardegsen	Aeolian	Bleached-SBS	62.7	2.1	1.7	1	0.1	0.1	2.7	0.1	0	1.7	3.3	0	0	8.7	0.3	5.3	0.1	0	0.1	300	94.2857	3.15789	2.55639
MBS-35	AND-06	2897.25	Detfurth	Fluvial	Bleached-SBS	52	4	4	0	2	0.1	4	0	3	0	10	3	0	0	0.1	7	0	0	0.1	213.5	86.6667	6.66667	6.66667
MBS-36	AND-06	2900.05	Detfurth	Fluvial	Bleached-SBS	54	3	5	0	1	0.1	4	0	0	1	10	3	0	0	0	6	0	0	0.1	213.5	87.0968	4.83871	8.06452
MBS-37	SGZ-01	3206.5	Detfurth	Aeolian	Bleached-SBS	57	3.3	2.3	5.7	0.7	0.3	1.3	0	0	7	1	0	0	0	4	1	0	0	0	417.5	91.0543	5.27157	3.67412
MBS-38	SGZ-01	3207.65	Detfurth	Aeolian	Bleached-SBS	55	4.6	2	2.7	0.7	0.3	0.3	0	0	4	1.3	0	0	0	1.7	1.7	0	0	0	338.5	89.2857	7.46753	3.24675
MBS-39	SGZ-01	3209.4	Detfurth	Aeolian	Bleached-SBS	59.7	5.6	3	0.7	0.1	0.3	0.7	0	0	2	0.3	0	0	0	2	1.7	0	0	0	338.5	87.4085	8.19912	4.39239
MBS-40	SGZ-01	3210.6	Detfurth	Fluvial	Bleached-SBS	57.4	4	3.6	0	0.3	0.1	0.1	0	0	7.3	0.7	0	0	0	3	1	0	0	0	443.5	88.3077	6.15385	5.53846
MBS-41	SGZ-01	3212	Detfurth	Aeolian	Bleached-SBS	58.4	5.4	3.6	0.1	0.1	0.7	1	0	0	7	1.3	0	0	0	2	0.7	0	0	0	338.5	86.6469	8.01187	5.34125
MBS-42	SGZ-01	3214	Detfurth	Aeolian	Bleached-SBS	63.4	4	3.6	0	0.3	0.1	0.7	0	0	3	1.7	0	0	0	2	0.3	0	0	0	294	89.2958	5.6338	5.07042
MBS-43	SGZ-01	3215.25	Detfurth	Aeolian	Bleached-SBS	59	4	3.7	0	0.1	0.1	1	0	0	4.3	1.3	0	0	0	2	1.7	0	0	0	270	88.4558	5.997	5.54723
MBS-44	SGZ-01	3261.35	Detfurth	Aeolian	Bleached-SBS	51.3	6	3	3.7	0..7	0.3	0.7	0	0	7	1.7	0	0	0	4.7	0.7	0	0	0	281	85.0746	9.95025	4.97512
MBS-45	VAL-01	2821.5	Detfurth	Fluvial	Bleached-SBS	62.4	6.3	1.3	0.1	0	0.1	1	0	0	17.7	0	0	0	11.3	0	0	0	0	0	213.5	89.1429	9	1.85714
MBS-46	VAL-01	2823.9	Detfurth	Fluvial	Bleached-SBS	46.7	7.7	23.7	10	0.3	0.3	0.1	0	0	10.7	0	0	0	0	0	0.1	0	0	0	106.5	59.7951	9.85915	30.3457
MBS-47	VAL-01	2826.35	Detfurth	Fluvial	Bleached-SBS	39.7	6.7	12.3	34.7	2.3	0.1	0	0	0	16	0	0	0	0	0	0.1	0	0	0	93.5	67.632	11.414	20.954
MBS-48	VAL-01	2828.1	Detfurth	Fluvial	Bleached-SBS	46	13.7	0.7	21.7	0.1	0.3	0	0	0	16.7	0	0	0	0.7	0	0.1	0	0	0	93.5	76.1589	22.6821	1.15894
MBS-49	VAL-01	2831.4	Detfurth	Fluvial	Bleached-SBS	49.7	11.9	0.7	0	2	0.3	0	0	0	9.7	0	0	0	0.7	0	0.1	0	0	0	75	79.7753	19.1011	1.1236
MBS-50	VAL-01	2833.75	Detfurth	Fluvial	Bleached-SBS	62	7.3	1.3	4.7	0.7	0.1	0.3	0	0	17.3	0	0	0	0	0.1	0.1	0	0	0	213.5	87.8187	10.3399	1.84136
MBS-51	CAP-01	3160.14	Detfurth	Aeolian	Bleached-SBS	37	15	20	0	0.1	0.1	0.1	0	0	0	0	0	0	0	0	3	2	0	5	375	51.3889	20.8333	27.7778
MBS-52	CAP-01	3166.13	Detfurth	Aeolian	Bleached-SBS	42	5	20	0	0.1	0.1	2	0	10	0	0	0	0	0.1	0	1	0.1	0	0.1	375	62.6866	7.46269	29.8507
MBS-53	BRAK-01	2454.2	Detfurth	N/A	Bleached-SBS	36.3	8.7	22	0.3	1.3	0.1	2	0	0	7	0	0	0	0	0	0.7	0	0	0.3	213.5	54.1791	12.9851	32.8358
MBS-54	BRAK-01	2459.6	Detfurth	N/A	Bleached-SBS	33	4	29.3	1.3	3	0.3	0.7	0	0	12.3	0	0	0	0	0	1.3	0	0	0.1	151	49.7738	6.03318	44.1931
MBS-55	BRAK-01	2462.7	Detfurth	N/A	Bleached-SBS	45	4.7	28.3	0.3	3	0.1	6	0	0	0.1	0	0	0	0	0	1.8	0	0	0.3	263.5	57.6923	6.02564	36.2821
MBS-56	BRAK-01	2467.8	Detfurth	N/A	Bleached-SBS	30.7	2.3	39.7	1	2.3	0.1	0.7	0	0	20	0	0	0	0	0	0.7	0	0	0.1	132.5	42.2283	3.16369	54.608
MBS-57	BRAK-01	2472.6	Detfurth	N/A	Bleached-SBS	49	3.7	21.3	2.3	1.3	0	4.3	0	0	7.7	0	0	0	0	0	1.3	0	0	0.1	213.5	66.2162	5	28.7838
MBS-58	BRAK-01	2477.1	Detfurth	N/A	Bleached-SBS	44.7	6.7	15	0	1.3	0	14.3	0	0	14.3	0	0	0	0	0	5	0	0	0.7	263.5	67.3193	10.0904	22.5904
MBS-59	AND-06	2907.7	Detfurth	Fluvial	Bleached-SBS	53	3	11	0	0.1	0.1	6	0	0	0.1	8	1	0	0	0.1	4	0	0	0.1	263.5	79.1045	4.47761	16.4179
MBS-60	AND-06	2909.25	Detfurth	Fluvial	Bleached-SBS	53	4	7	0	1	0	7	0	0	0.1	5	3	0	0	0.1	4	0	0	0.1	263.5	82.8125	6.25	10.9375
MBS-61	VAL-01	2833.75	Detfurth	Fluvial	Bleached-SBS	62	7.3	1.3	4.7	0.7	0.1	0.3	0	0	17.3	0	0	0	0	0.1	0.1	0	0	0	263.5	87.8187	10.3399	1.84136
MBS-62	VAL-01	2837.2	Detfurth	Aeolian	Bleached-SBS	66	7	1.7	0.7	0.3	0.3	1.7	0	0	13	0	0	0	0	0.3	0.1	0	0	0	300	88.3534	9.37082	2.27577
MBS-63	VAL-01	2839.7	Detfurth	Fluvial	Bleached-SBS	69.7	8	1.7	7	0.1	0.1	0.1	0	0	11.7	0	0	0	0	0.1	0.1	0	0	0	213.5	87.7834	10.0756	2.14106
MBS-64	VAL-01	2841.5	Detfurth	Fluvial	Bleached-SBS	67.7	3.7	0.3	0.1	0.1	0.1	2.3	0	0	15	0	0	0	3.3	0.7	0.3	0	0	0	300	94.4212	5.16039	0.41841
MBS-65	VAL-01	2843	Detfurth	Aeolian	Bleached-SBS	68.7	5.7	0.7	3.7	0.1	0.1	0.3	0	0	16.7	0	0	0	0.3	0.7	1	0	0	0	213.5	91.478	7.58988	0.932091
MBS-66	VAL-01	2844.8	Detfurth	Fluvial	Bleached-SBS	60	4.7	0.1	2	0.7	0	1.3	0	0	24	0	0	0	0.1	0.3	0.7	0	0	0	300	92.5926	7.25309	0.154321
MBS-67	VAL-01	2846.35	Detfurth	Fluvial	Bleached-SBS	59.3	4.7	0.1	0	0.3	0.1	2	0	0	25	0	0	0	0.3	0.7	0.7	0	0	0	213.5	92.5117	7.33229	0.156006
MBS-68	VAL-01	2848.45	Detfurth	Fluvial	Bleached-SBS	58.3	4.7	0.3	2	0.1	0.1	0.7	0	0	31.7	0	0	0	1	0.1	0.1	0	0	0	213.5	92.1011	7.42496	0.473934
MBS-69	VAL-01	2851.2	Detfurth	Fluvial	Bleached-SBS	67	5	0.7	2.3	0.1	0.1	2.3	0	0	16	0	0	0	0.1	0.1	0.3	0	0	0	187.5	92.1596	6.87758	0.962861
MBS-70	Q16-08	3932.55	Volpriehausen	Fluvial	Bleached-SBS	71.7	9.7	0.3	5	0.1	0.7	0.3	0.1	0	4.7	0	0	0	0	0	2.3	0.7	0	0.1	93.5	87.7601	11.8727	0.367197
MBS-71	Q16-08	3955.9	Volpriehausen	Fluvial	Bleached-SBS	69.3	14.7	1	2	0.1	0.1	0.3	0.1	0	7	0	0	0	0	0	0.1	0	0	0	213.5	81.5294	17.2941	1.17647
MBS-72	Q16-08	3937.5	Volpriehausen	Aeolian	Bleached-SBS	67.7	14.7	1.3	2	0.1	0.1	5	0.1	0	4.3	0	0	0	0	0	2.3	0	0	0	213.5	80.8841	17.5627	1.55317
MBS-73	Q16-08	3941.8	Volpriehausen	Aeolian	Bleached-SBS	72.7	7.3	0.2	0	0	0.1	7	0	0	12.7	0	0	0	0	0	0	0	0	0.1	213.5	90.6484	9.10224	0.249377
MBS-74	Q16-08	3943.75	Volpriehausen	Fluvial	Bleached-SBS	72.3	10.7	0.3	2	0.1	0.7	1	0	0	9.7	0	0	0	0	0	0.1	0	0	0.1	106.5	86.7947	12.8451	0.360144
MBS-75	Q16-08	3945.53	Volpriehausen	Aeolian	Bleached-SBS	77	11	0.7	0	0	0.1	3.3	0	0	7	0	0	0	0.1	0	0.1	0	0	0.1	187.5	86.8095	12.4014	0.789177
MBS-76	Q16-08	3946.93	Volpriehausen	Fluvial	Bleached-SBS	69	5	0.3	0.3	0.1	0.1	0.7	0	0	20	0	0	0	0	0	0.1	0	0	0	300	92.8668	6.72948	0.403769
MBS-77	Q13-04	2787	Volpriehausen	Fluvial	Bleached-SBS	68.3	17.3	0.3	1.3	0.3	0.1	0.1	0	0	1	0	0	0	2	0	0.1	0	0	0	106.5	79.5111	20.1397	0.349243
MBS-78	Q13-04	2790	Volpriehausen	Fluvial	Bleached-SBS	64.7	9.3	1.3	4.3	0.1	0.1	0.1	0	0	14.3	0	0	0	4.7	0	0.1	0	0	0	106.5	85.923	12.3506	1.72643
MBS-79	Q13-04	2791.5	Volpriehausen	Fluvial	Bleached-SBS	67.7	6.7	1.3	0.3	0.1	0	0.3	0	0	3	0	0	0	20.7	0	0	0	0	0	93.5	89.432	8.85073	1.71731
MBS-80	Q13-04	2794.2	Volpriehausen	Fluvial	Bleached-SBS	54.3	16.3	1.7	19.3	1	0.1	0	0	0	6.3	0	0	0	0	0	0.3	0	0.1	0	75	75.1037	22.545	2.35131
MBS-81	Q13-04	2797.2	Volpriehausen	Fluvial	Bleached-SBS	55	9.3	1	17.3	0.1	0.1	0.3	0	0	17	0	0	0	0	0	0.1	0	0.1	0	187.5	84.2266	14.242	1.53139
MBS-82	Q13-04	2799	Volpriehausen	Fluvial	Bleached-SBS	61.7	9.7	1.3	2	0.1	0.1	0.3	0	0	0.7	0	0	0	22.7	0	1.7	0	0.1	0	213.5	84.8693	13.3425	1.78817
MBS-83	Q13-06	2755.6	Volpriehausen	Fluvial	Bleached-SBS	76	3	0.3	7.3	0.1	0.1	1	0	0	7	0	0	0	2.7	0.7	0.1	0	0.1	0	263.5	95.8386	3.7831	0.37831
MBS-84	Q13-06	2758.5	Volpriehausen	Fluvial	Bleached-SBS	53.7	9.3	0.3	18	0.7	0.3	0.1	0	0	15	0	0	0	0	0	1.7	0	0	0	75	84.8341	14.6919	0.473934
MBS-85	Q13-06	2761.3	Volpriehausen	Fluvial	Bleached-SBS	49	5.7	0.7	26	0.3	0.1	0.7	0	0	15.7	0	0	0	0.3	0.3	1	0	0.1	0	75	88.4477	10.2888	1.26354
MBS-86	Q13-06	2763.3	Volpriehausen	Fluvial	Bleached-SBS	71.7	6.3	0.5	11.7	0.7	0	3	0	0	1.3	0	0	0	2.3	0.3	1	0	0	0	93.5	91.3376	8.02548	0.636943
MBS-87	Q13-06	2765.1	Volpriehausen	Fluvial	Bleached-SBS	47	4.3	0.3	0.7	0.1	0	2.7	0	0	26.3	0	0	0	1.3	4	1.3	0	0	0	213.5	91.0853	8.33333	0.581395
MBS-88	Q13-06	2768.2	Volpriehausen	Fluvial	Bleached-SBS	56	3.7	0.7	0.1	0.1	0.1	1.7	0	0	19.7	0	0	0	1.3	5.3	0.3	0	0.1	0	213.5	92.7152	6.12583	1.15894
MBS-89	Q13-06	2771.2	Volpriehausen	Fluvial	Bleached-SBS	60.7	4.7	1	1	0.1	0.3	0.1	0	0	21	0	0	0	1	1.3	2	0	0.3	0	132.5	91.4157	7.07831	1.50602
MBS-90	Q13-06	2774.2	Volpriehausen	Fluvial	Bleached-SBS	60	2.7	0.7	0.7	0	0	1.3	0	0	23	0	0	0	0.3	1.7	0.7	0	0.1	0	75	94.6372	4.25868	1.1041
MBS-91	Q13-06	2776.6	Volpriehausen	Fluvial	Bleached-SBS	65.3	3	0.3	2	0.1	0.1	1.7	0	0	16.3	0	0	0	1.3	1.3	0.3	0	0.1	0	75	95.1895	4.37318	0.437318
MBS-92	OTL-01	2580.71	Volpriehausen	Aeolian	Bleached-SBS	64	4	4	3	2	0.1	1	0.1	0	11	0	0	0	0	0.1	5	0	0	0.1	263.5	88.8889	5.55556	5.55556
MBS-93	OTL-01	2582.2	Volpriehausen	Aeolian	Bleached-SBS	65	2	3	1	0.1	0.1	0.1	0	0	10	0	1	0	0.1	0	6	0	0	0.1	530	92.8571	2.85714	4.28571
MBS-94	OTL-01	2583.1	Volpriehausen	Playa Lake	Bleached-SBS	67	2	3	1	0.1	0.1	0.1	0	0	1	0	0	0	0.1	0	3	8	0	0.1	425	93.0556	2.77778	4.16667
MBS-95	OTL-01	2583.71	Volpriehausen	Playa Lake	Bleached-SBS	60	3	8	0	0.1	0	0.1	0	0	2	0	0.1	0	0.1	0	4	8	0	0.1	425	84.507	4.22535	11.2676
MBS-96	OTL-01	2584.62	Volpriehausen	Playa Lake	Bleached-SBS	64	2	8	0	0.1	0.1	0.1	0	0	0.1	0	0	0	1	0.1	3	6	0	0.1	425	86.4865	2.7027	10.8108
MBS-97	OTL-01	2586.01	Volpriehausen	Aeolian	Bleached-SBS	62	2	7	0	0.1	0.1	8	0	0	6	0	0	0	0.1	0.1	3	0	0	0.1	375	87.3239	2.8169	9.85915
MBS-98	OTL-01	2586.63	Volpriehausen	Playa Lake	Bleached-SBS	59	6	8	0	0.1	0.1	10	0	0	0.1	0	0	0	1	0	2	4	0	0	375	80.8219	8.21918	10.9589
MBS-99	OTL-01	2587.2	Volpriehausen	Aeolian	Bleached-SBS	60	6	6	0	0.1	0.1	0.1	0	0	11	0	0	0	0.1	0.1	3	4	0	0.1	300	83.3333	8.33333	8.33333
MBS-100	OTL-01	2594.29	Volpriehausen	Playa Lake	Bleached-SBS	55	6	8	2	0.1	1	0.1	0	0	8	0	0	0	0	0	5	1	0	1	375	79.7101	8.69565	11.5942
MBS-101	CAP-01	3207.82	Volpriehausen	Aeolian	Bleached-SBS	35	10	15	0	0.1	0.1	8	0.1	20	0	0	0	0	0	0	1	0.1	0	0.1	213.5	58.3333	16.6667	25
MBS-102	CAP-01	3213.02	Volpriehausen	Playa Lake	Bleached-SBS	42	10	15	0	0.1	0.1	0.1	0	10	0	0	0	0	0	0	4	4	0	0.1	338.5	62.6866	14.9254	22.3881
MBS-103	CAP-01	3216.07	Volpriehausen	Playa Lake	Bleached-SBS	39	10	15	0	0.1	0.1	4	0	15	0	0	0	0	0	0	2	1	0	0.1	338.5	60.9375	15.625	23.4375
MBS-104	CAP-01	3220.56	Volpriehausen	Playa Lake	Bleached-SBS	42	10	15	0	0.1	0.1	10	0.1	15	0	0	0	0	0	0	0.1	0	0	0.1	263.5	62.6866	14.9254	22.3881
MBS-105	VAL-01	2855.05	Volpriehausen	Fluvial	Bleached-SBS	62	9.7	0.3	4.3	0.1	0.3	0.1	0	0	22.3	0	0	0	0.3	0	0.1	0	0	0	132.5	86.1111	13.4722	0.416667
MBS-106	VAL-01	2857.85	Volpriehausen	Playa Lake	Bleached-SBS	51.3	3.7	4.3	22.7	0.1	0.1	0.1	0	0	11.7	0	0	0	0.3	0	1.3	0	0	0	93.5	86.5093	6.23946	7.25126
MBS-107	VAL-01	2861.35	Volpriehausen	Playa Lake	Bleached-SBS	34	4	0.1	50.7	1	0.1	0	0	0	7.3	0	0	0	0	0	0.1	0.1	0	0	75	89.2388	10.4987	0.262467
MBS-108	VAL-01	2864.55	Volpriehausen	Playa Lake	Bleached-SBS	65.7	14.7	0.1	5.3	1.7	0.7	0.1	0	0	11.7	0	0	0	0.1	0	0.3	0	0	0	75	81.6149	18.2609	0.124224
MBS-109	VAL-01	2868.25	Volpriehausen	Fluvial	Bleached-SBS	71.3	11.3	1.3	3	0.1	0.1	0.1	0	0	12.3	0	0	0	0.1	0	0.1	0	0	0	151	84.9821	13.4684	1.54946
MBS-110	VAL-01	2870.15	Volpriehausen	Aeolian	Bleached-SBS	73.7	3	1.7	0.7	0.3	0.1	0.1	0	0	11.3	0	0	0	5.3	0	0.1	0	0	0	213.5	94.0051	3.82653	2.16837
MBS-111	VAL-01	2872.75	Volpriehausen	Fluvial	Bleached-SBS	70	5.3	1	1.3	0	0.1	0.1	0	0	22	0	0	0	0.1	0	0.3	0	0.5	0	106.5	91.7431	6.94626	1.31062
MBS-112	VAL-01	2875.4	Volpriehausen	Aeolian	Bleached-SBS	60.7	7.3	0.1	3.7	0.3	0.1	0.1	0	0	14.7	0	0	0	0.1	0.3	1	0	0	0	93.5	89.1336	10.7195	0.146843
MBS-113	VAL-01	2877.5	Volpriehausen	Aeolian	Bleached-SBS	67.7	8.7	1	4.3	0.1	0.1	0.1	0	0	14	0	0	0	1.3	0.1	1	0	0	0	151	87.4677	11.2403	1.29199
MBS-114	VAL-01	2880.2	Volpriehausen	Fluvial	Bleached-SBS	54.3	4.7	1.7	1.3	0.1	0.1	2	0	0	29.7	0	0	0	0.7	0.7	1.3	0	0.5	0	213.5	89.4563	7.743	2.80066
MBS-115	KDK-01	2258.25	Volpriehausen	Fluvial	Bleached-SBS	53	8.2	10	1	0	0	6	0	0	4	6	0	0	0	2	0	1	0	0	300	74.4382	11.5169	14.0449
MBS-116	KDK-01	2263.48	Volpriehausen	Fluvial	Bleached-SBS	50	4	13	0.1	1	0.1	7	0	0	9	2	0	0	0	3	0	0.1	0	0	300	74.6269	5.97015	19.403
MBS-117	KDK-01	2271.25	Volpriehausen	Fluvial	Bleached-SBS	49	11	8	6	3	0.1	1	0	0	9	5	0.1	0	0	1	0	0.1	0	0	300	72.0588	16.1765	11.7647
MBS-118	KDK-01	2273.75	Volpriehausen	Fluvial	Bleached-SBS	46	5	16	0.1	0.1	0	16	0	0	6	3	0.1	0	0.1	0	0	0	0	0	300	68.6567	7.46269	23.8806
MBS-119	NWk-02	2592.6	Volpriehausen	Aeolian	Bleached-SBS	59.7	10.3	0.1	1.7	0.3	0.1	1.3	0	13.3	2	0	0	0	1	0	1.7	0	0	0	213.5	85.1641	14.6933	0.142653
MBS-120	NWk-02	2593.8	Volpriehausen	Fluvial	Bleached-SBS	54.7	14	1	0.3	0.3	0.1	0.7	0	1.3	11.3	0	0.1	0	0.3	0	1	0	0	0	213.5	78.4792	20.0861	1.43472
MBS-121	NWk-02	2596.2	Volpriehausen	Fluvial	Bleached-SBS	37.7	1	0.1	0	0.1	0.1	0.3	0	22.7	1.3	0	0	0	0	0	0.3	0	0	0	213.5	97.1649	2.57732	0.257732
MBS-122	NWk-02	2599.8	Volpriehausen	Fluvial	Bleached-SBS	39.3	11.1	0.7	1.7	0.1	0.1	0.3	0	20.7	13	0	0	0	1	0	1	0	0	0	187.5	76.908	21.7221	1.36986
AGS-Average Grain Size, An-Anhydrite, Ank-Ankarite, Cal-Calcite, Ch-Chlorite, DC-Detrital Clay, Dol-Dolomite, Fe-Dol-Ferroan Dolomite, Fo-Feldspar overgrowth, Hem-Hematite, HM-Heavy Minerals, Ill-Illite, Kao-Kaolinite, Kfs-K-feldspar, LBBS-Lamina-bound Bleached Sandstone, MB-Middle Buntsandstein, MBS-Main Buntsandstein Subgroup, Mi-Mica, MIRF-Metamorphic and Igneous Rock Fragments, PBS-Patchy Ble…
